# Supplementary material for: Diet Quality among Cancer Survivors and Participants without Cancer: A Population-Based, Cross-Sectional Study in the Atlantic Partnership for Tomorrow’s Health Project
Source: MDPI journal article supplement (doi:10.3390/nu11123027), 2019-12-11
Supplement: s1 [file s1]

## Supplementary Material

**Table S1. Diet quality component scores among cancer survivors and non-cancer controls combined**

| <b>Component</b>                                                      | <b>Mean (SD)</b> |
|-----------------------------------------------------------------------|------------------|
| Vegetables and fruit                                                  | 6.75 (2.78)      |
| Grain products                                                        | 4.32 (2.38)      |
| Milk and dairy products                                               | 6.74 (3.26)      |
| Meat and alternatives                                                 | 8.95 (2.09)      |
| Snack/dessert/non-diet soft drink                                     | 5.63 (3.15)      |
|                                                                       | <b>%</b>         |
| Eat at least one serving of dark green vegetables each day            | 75.6             |
| Have vegetables and fruit servings more than juice                    | 94.0             |
| Make at least half of grain products whole grain each day             | 81.5             |
| Avoid oil products while eating bread                                 | 10.7             |
| Drink lower fat milk or milk alternatives                             | 85.2             |
| Have meat alternatives such as beans, lentils, and tofu               | 30.1             |
| Eat fish (at least a serving/day)                                     | 38.8             |
| Do not eat saturated fat or its products                              | 78.0             |
| Never or rarely season food with soy sauce or fish sauce at the table | 79.8             |
| Never or rarely add salt to food at the table                         | 66.3             |

Mean diet quality component scores and standard deviations for the first five items of the diet quality scoring scheme (out of 10 with 10 representing greatest adherence) and percentages of participants meeting healthy eating recommendations for the last ten items.

**Table S2. Comparison of characteristics between cancer survivors and participants without cancer**

|                                        | Cancer survivors<br>N=14,965 | Participants without cancer<br>N=5,008 |
|----------------------------------------|------------------------------|----------------------------------------|
| <b>Age group, N (%)</b>                |                              |                                        |
| 35-39                                  | 1440 (9.62)                  | 567 (11.3)                             |
| 40-44                                  | 1698 (11.4)                  | 671 (13.4)                             |
| 45-49                                  | 2199 (14.7)                  | 857 (17.1)                             |
| 50-54                                  | 2692 (18.0)                  | 857 (17.1)                             |
| 55-59                                  | 2788 (18.6)                  | 820 (16.4)                             |
| 60-64                                  | 2534 (16.9)                  | 788 (15.7)                             |
| 65-69                                  | 1614 (10.8)                  | 448 (8.95)                             |
| <b>Sex</b>                             |                              |                                        |
| Female                                 | 9705 (64.9)                  | 4092 (81.7)                            |
| Male                                   | 5260 (35.2)                  | 916 (18.3)                             |
| <b>Marital status</b>                  |                              |                                        |
| Living without partners                | 2856 (19.1)                  | 960 (19.2)                             |
| Living with partners                   | 12077 (80.9)                 | 4038 (80.8)                            |
| <b>Ethnicity</b>                       |                              |                                        |
| White                                  | 13006 (93.0)                 | 4412 (93.6)                            |
| Non-white                              | 975 (6.97)                   | 304 (6.45)                             |
| <b>Household income</b>                |                              |                                        |
| 0-24,999                               | 679 (4.81)                   | 173 (3.66)                             |
| 25,000-49,999                          | 2483 (17.6)                  | 730 (15.5)                             |
| 50,000-74,999                          | 3057 (21.7)                  | 916 (19.4)                             |
| 75,000-149,999                         | 6109 (43.3)                  | 2193 (46.4)                            |
| >150,000                               | 1784 (12.6)                  | 711 (15.1)                             |
| <b>Education (completed)</b>           |                              |                                        |
| ≤ high school                          | 3140 (21.1)                  | 696 (13.9)                             |
| college                                | 6182 (41.5)                  | 1913 (38.3)                            |
| ≥ Bachelor's degree                    | 5585 (37.6)                  | 2390 (47.8)                            |
| <b>Smoking status<sup>‡</sup></b>      |                              |                                        |
| Never                                  | 7319 (49.3)                  | 2748 (55.3)                            |
| Former                                 | 5894 (39.7)                  | 1881 (37.9)                            |
| Occasional                             | 380 (2.56)                   | 120 (2.42)                             |
| Regular                                | 1243 (8.38)                  | 217 (4.37)                             |
| <b>Alcohol consumption<sup>§</sup></b> |                              |                                        |
| Abstainer                              | 646 (4.34)                   | 184 (3.69)                             |
| Former drinker                         | 1048 (7.04)                  | 284 (5.69)                             |
| Occasional drinker                     | 6134 (41.2)                  | 2145 (43.0)                            |
| Regular drinker                        | 4592 (30.9)                  | 1662 (33.3)                            |
| Habitual drinker                       | 2456 (16.5)                  | 714 (14.3)                             |
| <b>Physical activity</b>               |                              |                                        |
| Low                                    | 3338 (23.3)                  | 641 (13.3)                             |
| Moderate                               | 4482 (31.3)                  | 1394 (28.9)                            |

|                              |              |             |
|------------------------------|--------------|-------------|
| High                         | 6511 (45.4)  | 2785 (57.8) |
| <b>BMI</b>                   |              |             |
| Normal                       | 3994 (30.9)  | 2825 (29.5) |
| Underweight                  | 77 (0.60)    | 55 (0.57)   |
| Overweight                   | 4922 (38.0)  | 3725 (38.9) |
| Obese                        | 3947 (30.5)  | 2975 (31.1) |
| <b>Diabetes</b>              |              |             |
| Yes                          | 749 (5.06)   | 249 (5.02)  |
| No                           | 14068 (94.9) | 4713 (95.0) |
| <b>Myocardial infarction</b> |              |             |
| Yes                          | 288 (1.94)   | 65 (1.31)   |
| No                           | 14577 (98.1) | 4912 (98.7) |
| <b>Urbanicity</b>            |              |             |
| Urban                        | 10689 (71.4) | 3658 (73.0) |
| Rural                        | 4276 (28.6)  | 1350 (27.0) |
| <b>Province</b>              |              |             |
| NL                           | 1993 (13.3)  | 519 (10.4)  |
| PEI                          | 290 (1.94)   | 87 (1.74)   |
| NS                           | 9394 (62.8)  | 3177 (63.4) |
| NB                           | 3288 (22.0)  | 1225 (24.5) |

Non-smoker: has never smoked, former: has smoked at least 100 cigarettes but not within the past 30 days, occasional: smoked at least once within the past 30 days but not daily, regular: smoked daily. All other participants were categorized as non-smokers. Abstainer: never consumes alcohol, former: has consumed alcohol before but not over the past 12 months, occasional:  $\leq 2$ –3 drinks month over the past 12 months, regular: drinks  $\geq$  once/week but  $\leq 2$ –3 times/week, habitual drinkers: drinks  $\geq 4$ –5 times/week. NB; New Brunswick, NL; Newfoundland, NS; Nova Scotia, PEI; Prince Edward Island
